# Supplementary material for: Tissue Bioengineering with Fibrin Scaffolds and Deproteinized Bone Matrix Associated or Not with the Transoperative Laser Photobiomodulation Protocol
Source: MDPI journal article supplement (doi:10.3390/molecules28010407), 2023-01-03
Supplement: s1 [file s1]

## Supplementary Materials

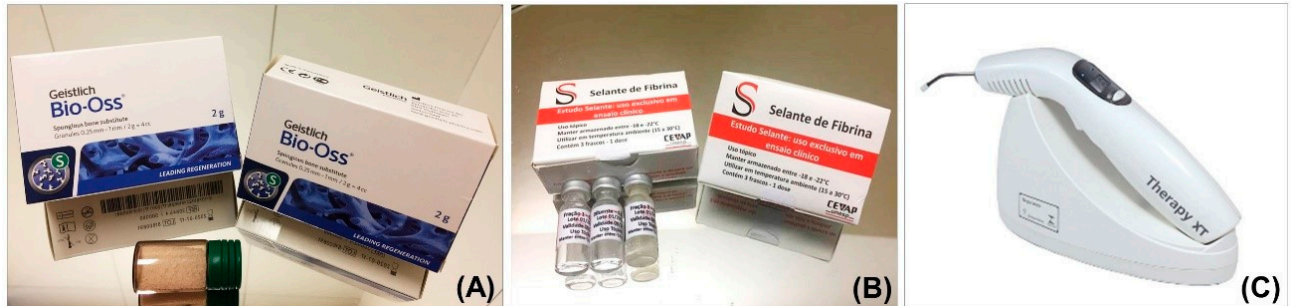

**Figure S1:** Materials used: (A) Deproteinized bovine matrix (Ministry of Health Registration No. 806.969.30002); (B) Fibrin biopolymer purified from snake venom (Ministry of Health Registration No. 1020140114327 and No. 1020140114360); (C) Therapeutic Laser, Therapy XT DMC® (Ministry of Health Registration 80030810157)

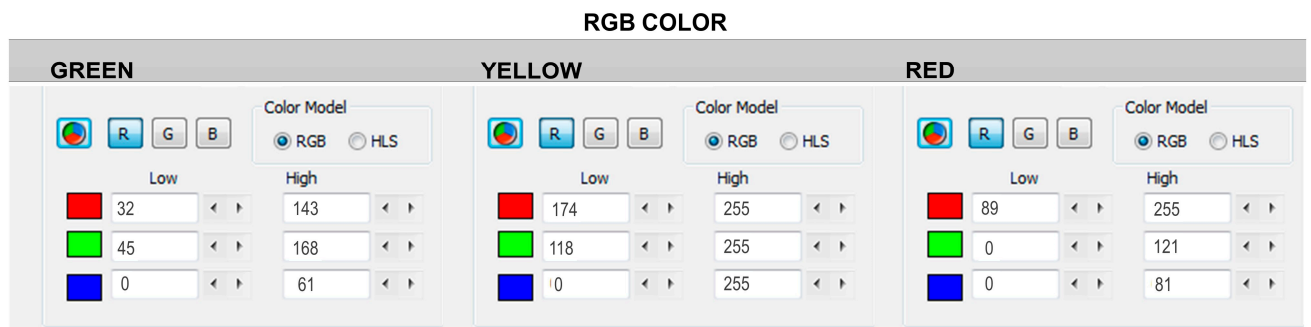

**Figure S2.** RGB—green-yellow-red for interpretation of color references in the birefringence analysis of collagen fibers, used in this study.
